# Supplementary material for: Hierarchical Ru nanospheres as highly effective cathode catalysts for Li–O2batteries
Source: Royal Society of Chemistry journal article supplement (doi:10.1039/c5ta05486a), 2015-01-01
Supplement: c5ta05486a1.pdf [file c5ta05486a1.pdf]

Supporting information

For

**Hierarchical Ru Nanospheres as Highly Effective Cathode Catalysts for Li-O<sub>2</sub> Batteries**

Dawei Su,<sup>\*a</sup> Shixue Dou,<sup>b</sup> and Guoxiu Wang<sup>\*a</sup>

<sup>a</sup>Centre for Clean Energy Technology, Faculty of Science, University of Technology Sydney,  
Broadway, Sydney, NSW 2007, Australia

<sup>b</sup>Institute for Superconducting and Electronic Materials, University of Wollongong,  
Wollongong, NSW 2522, Australia

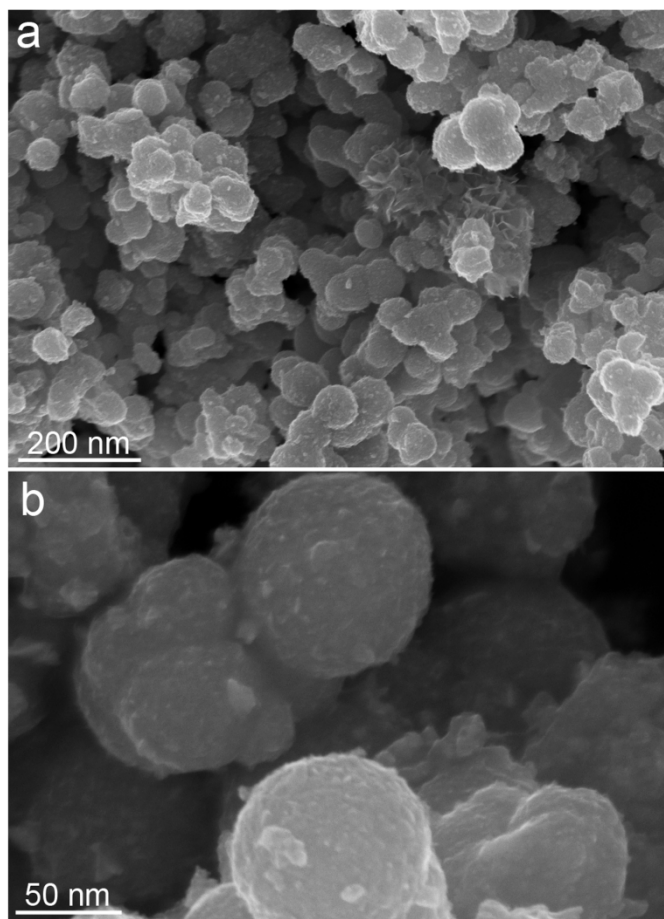

**Figure S1.** Low magnification FESEM images of hierarchical Ru nanospheres.

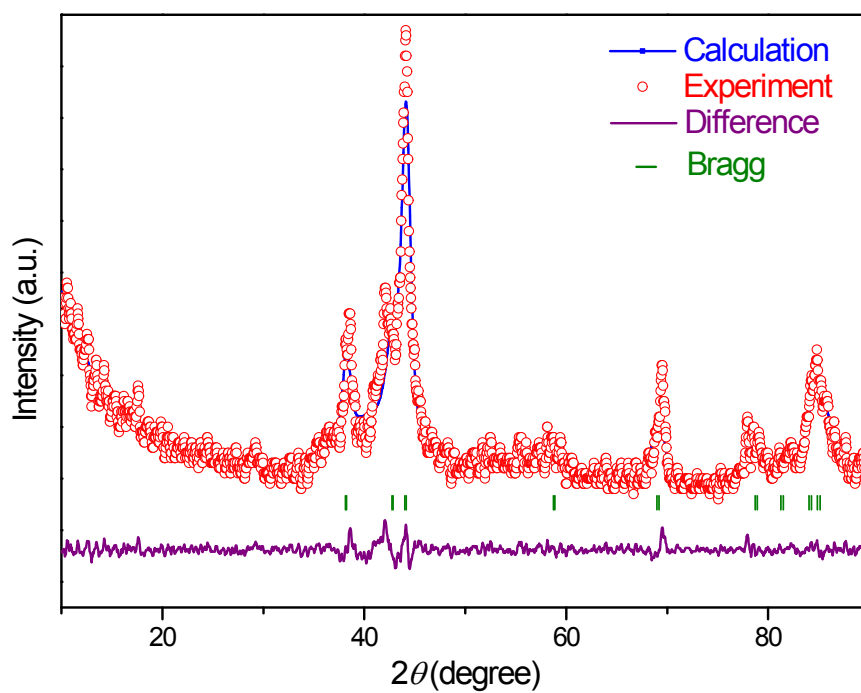

**Figure S2.** Rietveld refinement pattern of X-ray diffraction data for hierarchical Ru nanospheres. The observed and calculated intensities are represented by the red circles and the blue solid line, respectively. The bottom wine-coloured line shows the fitting residual difference. The Bragg positions are represented by light-green ticks.

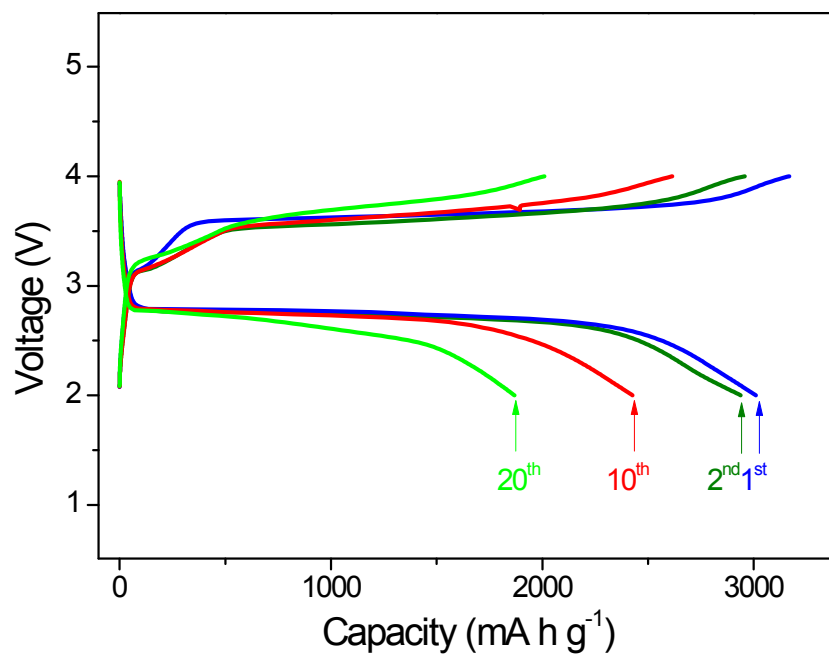

**Figure S3.** a. Charge and discharge profiles for selected cycles of the hierarchical Ru nanosphere electrode at current density of 400 mA g<sup>-1</sup>.
